# Supplementary material
Source: publisher figshare collection journal article supplement (https://sage.figshare.com/ndownloader/files/12550352)
Supplement: Supplementary file 1 [file 12550352]

## ONLINE APPENDIX

**Figure A1. Estimated relative difference in the quality-adjusted output of specialists versus generalists after the collapse of the Soviet Union using the matched sample.\***

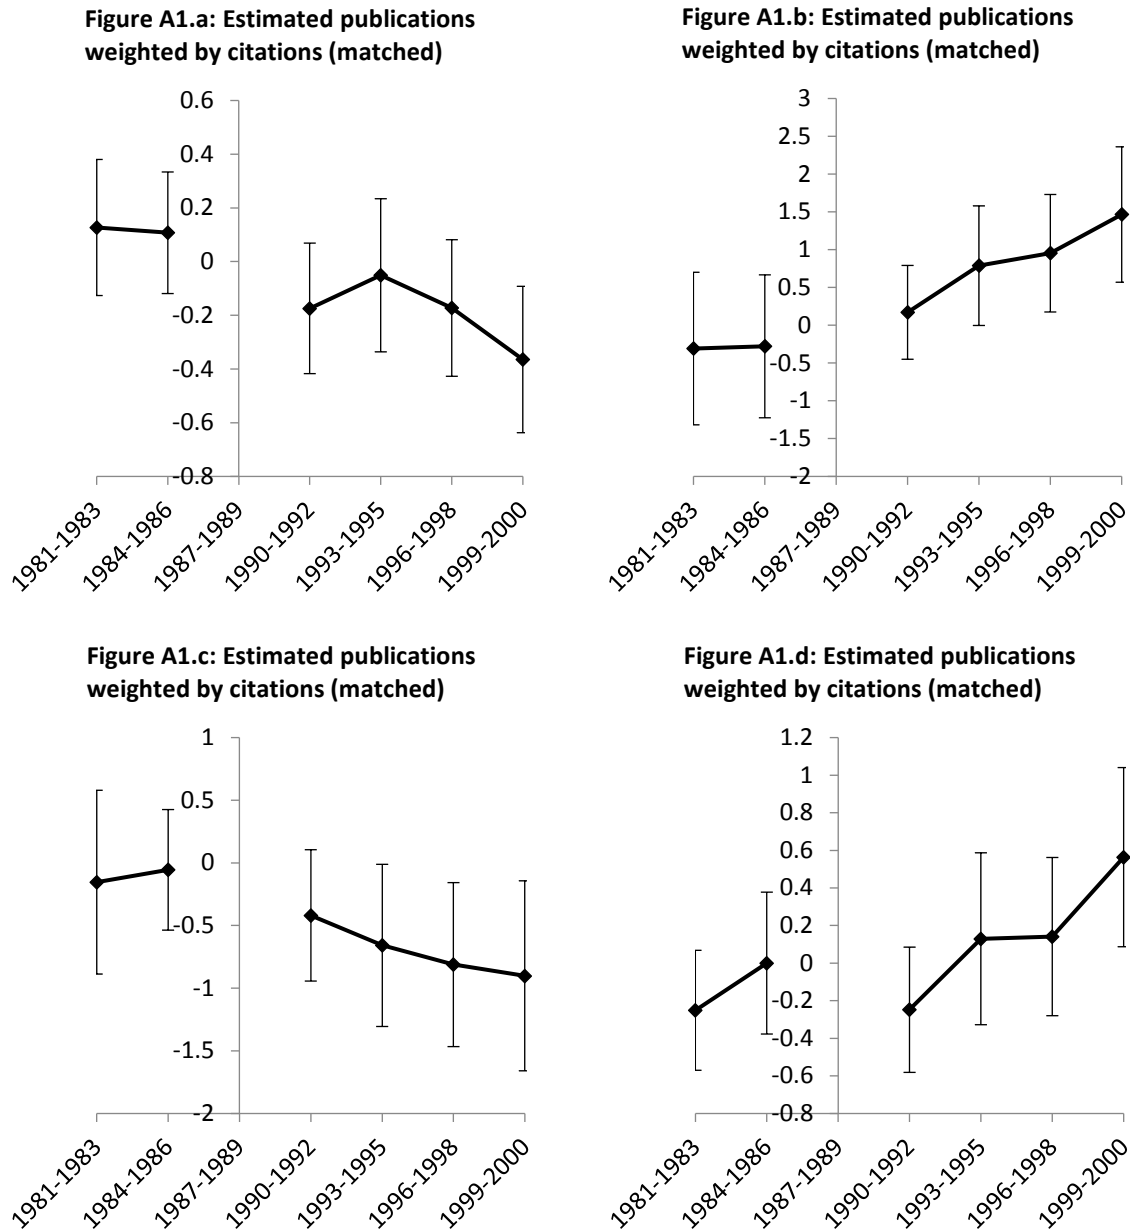

\* We base this figure on 10 years of publication data before the collapse of the Soviet Union and 10 years after the collapse. Each point on graph (a) represents the coefficient value on the covariate  $Specialist \times TimePeriod$  and thus describes the relative difference in quality-adjusted publication rates between specialists and generalists in slow-paced areas. Each point on graph (b) represents the coefficient value on the covariate  $Specialist \times SovietImpact \times TimePeriod$  and thus describes the relative difference in quality-adjusted publication rates between specialists and generalists in fast-paced areas and the same difference in slow-paced areas. Each point on graph (c) represents the coefficient value on the covariate  $SovietImpact \times TimePeriod$  and thus describes the relative difference in quality-adjusted publication rates between generalists in fast- versus slow-paced areas. Each point on graph (d) represents the sum of coefficients  $\beta_1 + \beta_3$  and thus describes the relative difference in quality-adjusted publication rates between specialists in fast- versus slow-paced areas. The bars surrounding each point represent the 95% confidence interval. Note that the larger confidence intervals are due to reduced degrees of freedom, as we split the post-Soviet dummy into multiple period dummies. All values are relative to the base-year group of 1987–1989. The estimates are based on the matched sample.

**Figure A2. Estimated relative difference in the total number of collaborators of specialists versus generalists after the collapse of the Soviet Union using the non-matched sample.\***

**Figure A2.a: Estimated total number of collaborators (not matched)**

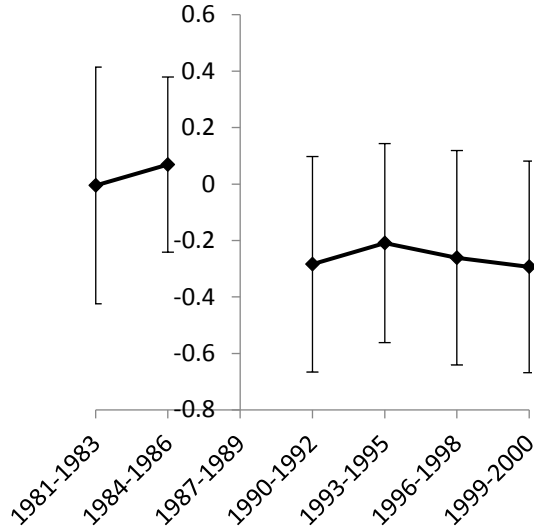

**Figure A2.b: Estimated total number of collaborations (not matched)**

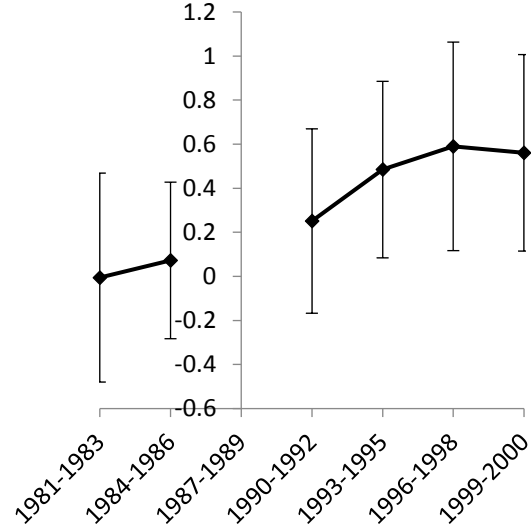

**Figure A2.c: Estimated total number of collaborators (not matched)**

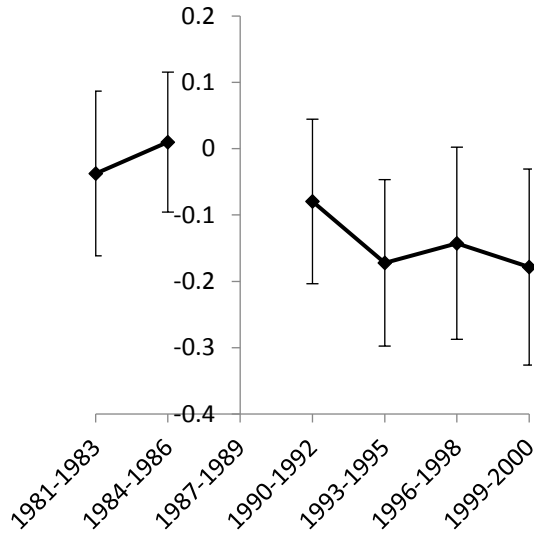

**Figure A2.d: Estimated total number of collaborators (not matched)**

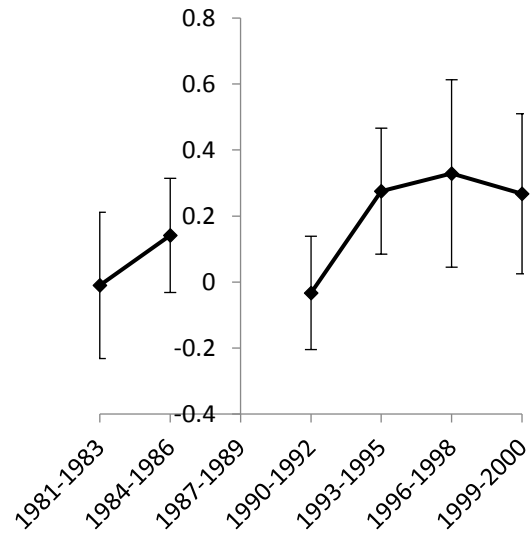

\* We base this figure on 10 years of publication data before the collapse of the Soviet Union and 10 years after the collapse. Each point on graph (a) represents the coefficient value on the covariate *Specialist*  $\times$  *TimePeriod* and thus describes the relative difference in the total number of collaborators between specialists and generalists in slow-paced areas. Each point on graph (b) represents the coefficient value on the covariate *Specialist*  $\times$  *SovietImpact*  $\times$  *TimePeriod* and thus describes the relative difference in the total number of collaborators between specialists and generalists in fast-paced areas and the same difference in slow-paced areas. Each point on graph (c) represents the coefficient value on the covariate *SovietImpact*  $\times$  *TimePeriod* and thus describes the relative difference in the total number of collaborators between generalists in fast- versus slow-paced areas. Each point on graph (d) represents the sum of coefficients  $\beta_1 + \beta_3$  and thus describes the relative difference in the total number of collaborators between specialists in fast- versus slow-paced areas. The bars surrounding each point represent the 95% confidence interval. Note that the larger confidence intervals are due to reduced degrees of freedom, as we split the post-Soviet dummy into multiple period dummies. All values are relative to the base-year group of 1987–1989. The estimates are based on the non-matched sample.

**Figure A3. Estimated relative difference in the number of unique collaborators of specialists versus generalists after the collapse of the Soviet Union using the non-matched sample.\***

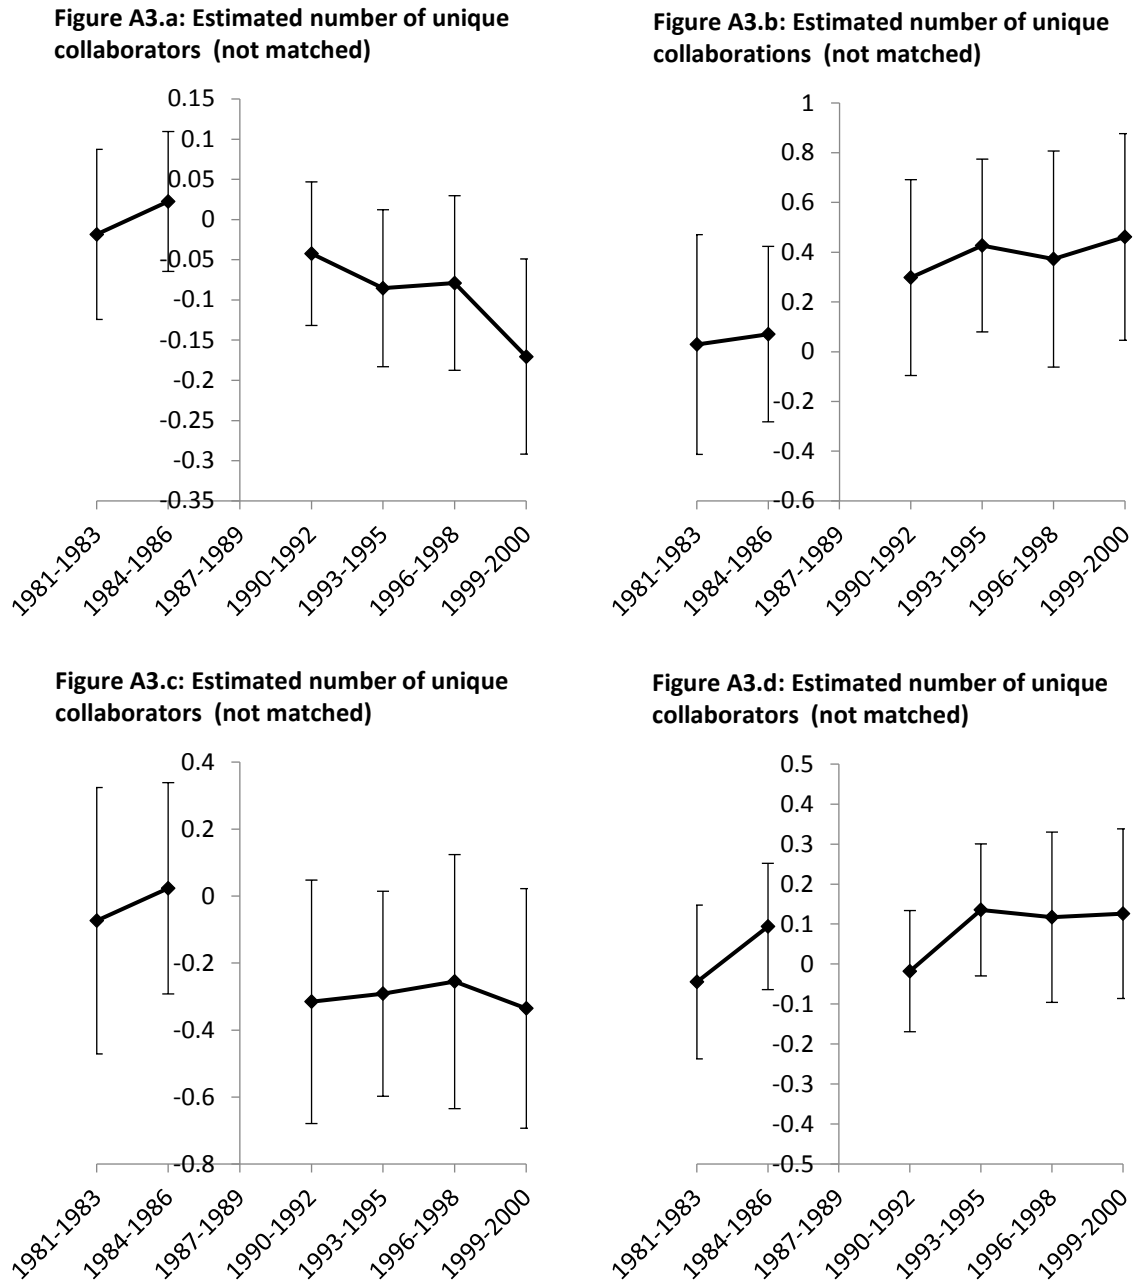

\* We base this figure on 10 years of publication data before the collapse of the Soviet Union and 10 years after the collapse. Each point on graph (a) represents the coefficient value on the covariate *Specialist*  $\times$  *TimePeriod* and thus describes the relative difference in the number of unique collaborators between specialists and generalists in slow-paced areas. Each point on graph (b) represents the coefficient value on the covariate *Specialist*  $\times$  *SovietImpact*  $\times$  *TimePeriod* and thus describes the relative difference in the number of unique collaborators between specialists and generalists in fast-paced areas and the same difference in slow-paced areas. Each point on graph (c) represents the coefficient value on the covariate *SovietImpact*  $\times$  *TimePeriod* and thus describes the relative difference in the number of unique collaborators between generalists in fast-versus slow-paced areas. Each point on graph (d) represents the sum of coefficients  $\beta_1 + \beta_3$  and thus describes the relative difference in the number of unique collaborators between specialists in fast- versus slow-paced areas. The bars surrounding each point represent the 95% confidence interval. Note that the larger confidence intervals are due to reduced degrees of freedom, as we split the post-Soviet dummy into multiple period dummies. All values are relative to the base-year group of 1987–1989. The estimates is based on the non-matched sample.

**Table A1. Differential Creative Output of Specialists Relative to Generalists in Areas Affected by the Collapse of the Soviet Union—Continuous Diversification Measure\***

| Variable                                                                             | Full Sample                               |                                                          | Matched Sample                            |                                                          |
|--------------------------------------------------------------------------------------|-------------------------------------------|----------------------------------------------------------|-------------------------------------------|----------------------------------------------------------|
|                                                                                      | Simple<br>count of<br>publications<br>(1) | Citation-<br>weighted<br>count of<br>publications<br>(2) | Simple<br>count of<br>publications<br>(3) | Citation-<br>weighted<br>count of<br>publications<br>(4) |
| Specialist $\times$<br>SovietImpact $\times$<br>AfterSovietCollapse<br>( $\beta_1$ ) | -.741**<br>(.252)                         | -1.115*<br>(.460)                                        | -.616+<br>(.330)                          | -1.580**<br>(.482)                                       |
| Specialist $\times$<br>AfterSovietCollapse<br>( $\beta_2$ )                          | .201**<br>(.062)                          | .429*<br>(.220)                                          | .236**<br>(.079)                          | .565**<br>(.191)                                         |
| SovietImpact $\times$<br>AfterSovietCollapse<br>( $\beta_3$ )                        | .038<br>(.045)                            | .056<br>(.090)                                           | .026<br>(.063)                            | .146<br>(.093)                                           |
| No. of observations                                                                  | 241,376                                   | 241,216                                                  | 169,061                                   | 169,061                                                  |
| No. of mathematicians                                                                | 12,929                                    | 12,917                                                   | 8,952                                     | 8,952                                                    |
| Chi <sup>2</sup>                                                                     | 1376.65**                                 | 306.54**                                                 | 861.64**                                  | 140.54**                                                 |
| Log-likelihood                                                                       | -247383.60                                | -2192008.90                                              | -160963.93                                | -1187197.60                                              |

+  $p < .10$ ; \*  $p < .05$ ; \*\*  $p < .01$ .

\* The data are a panel at the author level based on publication data between 1980 and 2000. The unit of analysis is the author-year. All models are Poisson with robust standard errors, clustered at the individual author level, in parentheses. All models include controls for cumulative publications, nonlinear age profile, and individual and year fixed effects. The difference in the number of observations across models is a consequence of estimating all our models using the *xtpoisson* command in Stata; the command drops units without within-individual variance after factoring in all the independent and control variables.

**Table A2. Differential Breakthrough Output of Specialists Relative to Generalists in Areas Affected by the Collapse of the Soviet Union—Continuous Diversification Measure\***

| Variable                                                                             | Full Sample                                                       |                                                                    | Matched Sample                                                    |                                                                    |
|--------------------------------------------------------------------------------------|-------------------------------------------------------------------|--------------------------------------------------------------------|-------------------------------------------------------------------|--------------------------------------------------------------------|
|                                                                                      | Count of<br>breakthroughs<br>(publications<br>in top 5%<br>cited) | Count of<br>breakthroughs<br>(publications<br>in top 10%<br>cited) | Count of<br>breakthroughs<br>(publications<br>in top 5%<br>cited) | Count of<br>breakthroughs<br>(publications<br>in top 10%<br>cited) |
|                                                                                      | (1)                                                               | (2)                                                                | (3)                                                               | (4)                                                                |
| Specialist $\times$<br>SovietImpact $\times$<br>AfterSovietCollapse<br>( $\beta_1$ ) | −1.373*<br>(.574)                                                 | −1.202**<br>(.442)                                                 | −1.707*<br>(.744)                                                 | −1.239*<br>(.539)                                                  |
| Specialist $\times$<br>AfterSovietCollapse<br>( $\beta_2$ )                          | .464**<br>(.175)                                                  | .467**<br>(.123)                                                   | .532*<br>(.224)                                                   | .501**<br>(.162)                                                   |
| SovietImpact $\times$<br>AfterSovietCollapse<br>( $\beta_3$ )                        | .129<br>(.098)                                                    | .110<br>(.076)                                                     | .254*<br>(.117)                                                   | .163<br>(.101)                                                     |
| No. of observations                                                                  | 79,756                                                            | 121,890                                                            | 51,607                                                            | 81,171                                                             |
| No. of<br>mathematicians                                                             | 4,215                                                             | 6,444                                                              | 2,724                                                             | 4,271                                                              |
| Chi <sup>2</sup>                                                                     | 353.50**                                                          | 616.77**                                                           | 177.82**                                                          | 309.03**                                                           |
| Log-likelihood                                                                       | −31159.56                                                         | −56972.73                                                          | −17403.04                                                         | −33442.78                                                          |

<sup>+</sup>  $p < .10$ ; \*  $p < .05$ ; \*\*  $p < .01$ .

\* The data are a panel at the author level based on publication data between 1980 and 2000. The unit of analysis is the author-year. All models are Poisson with robust standard errors, clustered at the individual author level, in parentheses. All models include controls for cumulative publications, nonlinear age profile, and individual and year fixed effects. The difference in the number of observations across models is a consequence of estimating all our models using the *xtpoisson* command in Stata; the command drops units without within-individual variance after factoring in all the independent and control variables.

**Table A3. Differential Number of Collaborators of Specialists Relative to Generalists in Areas Affected by the Collapse of the Soviet Union—Continuous Diversification Measure\***

| Variable                                                                    | Full Sample                          |                                             | Matched Sample                       |                                             |
|-----------------------------------------------------------------------------|--------------------------------------|---------------------------------------------|--------------------------------------|---------------------------------------------|
|                                                                             | Total number of collaborators<br>(1) | Total number of unique collaborators<br>(2) | Total number of collaborators<br>(3) | Total number of unique collaborators<br>(4) |
| Specialist $\times$ SovietImpact $\times$ AfterSovietCollapse ( $\beta_1$ ) | -1.238**<br>(.379)                   | -.978**<br>(.298)                           | -.932+<br>(.502)                     | -.863*<br>(.399)                            |
| Specialist $\times$ AfterSovietCollapse ( $\beta_2$ )                       | .229**<br>(.088)                     | .135+<br>(.072)                             | .340**<br>(.111)                     | .194*<br>(.093)                             |
| SovietImpact $\times$ AfterSovietCollapse ( $\beta_3$ )                     | .175*<br>(.067)                      | .075<br>(.056)                              | .163+<br>(.092)                      | .096<br>(.078)                              |
| No. of observations                                                         | 213,426                              | 213,440                                     | 148,535                              | 148,549                                     |
| No. of mathematicians                                                       | 11,416                               | 11,417                                      | 7,860                                | 7,861                                       |
| Chi <sup>2</sup>                                                            | 314.00**                             | 532.66**                                    | 223.42**                             | 328.82**                                    |
| Log-likelihood                                                              | -223550.06                           | -178252.42                                  | -140855.58                           | -116584.95                                  |

+  $p < .10$ ; \*  $p < .05$ ; \*\*  $p < .01$ .

\* The data are a panel at the author level based on publication data between 1980 and 2000. The unit of analysis is the author-year. All models are Poisson with robust standard errors, clustered at the individual author level, in parentheses. All models include controls for cumulative publications, nonlinear age profile, and individual and year fixed effects. The difference in the number of observations across models is a consequence of estimating all our models using the *xtpoisson* command in Stata; the command drops units without within-individual variance after factoring in all the independent and control variables.

**Table A4. Differential Creative Output of Specialists Relative to Generalists in Areas Affected by the Collapse of the Soviet Union—Continuous Soviet Index Measure and Our Main Specification of Specialists and Generalists (i.e., Top 10th Percentile of the Diversification Distribution)\***

| Variable                                                                             | Full Sample                               |                                                          | Matched Sample                            |                                                          |
|--------------------------------------------------------------------------------------|-------------------------------------------|----------------------------------------------------------|-------------------------------------------|----------------------------------------------------------|
|                                                                                      | Simple<br>count of<br>publications<br>(2) | Citation-<br>weighted<br>count of<br>publications<br>(1) | Simple<br>count of<br>publications<br>(4) | Citation-<br>weighted<br>count of<br>publications<br>(3) |
| Specialist $\times$<br>SovietImpact $\times$<br>AfterSovietCollapse<br>( $\beta_1$ ) | .404*<br>(.158)                           | .420<br>(.391)                                           | .455*<br>(.187)                           | 1.015*<br>(.403)                                         |
| Specialist $\times$<br>AfterSovietCollapse<br>( $\beta_2$ )                          | -.082*<br>(.033)                          | -.243*<br>(.108)                                         | -.060<br>(.039)                           | -.246**<br>(.081)                                        |
| SovietImpact $\times$<br>AfterSovietCollapse<br>( $\beta_3$ )                        | -.310*<br>(.121)                          | -.105<br>(.328)                                          | -.455*<br>(.146)                          | -.681*<br>(.295)                                         |
| No. of observations                                                                  | 113,512                                   | 113,406                                                  | 76,795                                    | 76,783                                                   |
| No. of mathematicians                                                                | 6,140                                     | 6,132                                                    | 4,024                                     | 4,024                                                    |
| Chi <sup>2</sup>                                                                     | 1063.34**                                 | 191.15**                                                 | 664.71**                                  | 98.62**                                                  |
| Log-likelihood                                                                       | -104277.83                                | -787244.10                                               | -68826.06                                 | -451704.49                                               |

<sup>+</sup>  $p < .10$ ; \*  $p < .05$ ; \*\*  $p < .01$ .

\* The data are a panel at the author level based on publication data between 1980 and 2000. The unit of analysis is the author-year. All models are Poisson with robust standard errors, clustered at the individual author level, in parentheses. All models include controls for cumulative publications, nonlinear age profile, and individual and year fixed effects. The difference in the number of observations across models is a consequence of estimating all our models using the *xtpoisson* command in Stata; the command drops units without within-individual variance after factoring in all the independent and control variables.

**Table A5. Differential Breakthrough Output of Specialists Relative to Generalists in Areas Affected by the Collapse of the Soviet Union—Continuous Soviet Index Measure and Our Main Specification of Specialists and Generalists (i.e., Top 10th Percentile of the Diversification Distribution)\***

| Variable                                                               | Full Sample                                                       |                                                                    | Matched Sample                                                    |                                                                    |
|------------------------------------------------------------------------|-------------------------------------------------------------------|--------------------------------------------------------------------|-------------------------------------------------------------------|--------------------------------------------------------------------|
|                                                                        | Count of<br>breakthroughs<br>(publications<br>in top 5%<br>cited) | Count of<br>breakthroughs<br>(publications<br>in top 10%<br>cited) | Count of<br>breakthroughs<br>(publications<br>in top 5%<br>cited) | Count of<br>breakthroughs<br>(publications<br>in top 10%<br>cited) |
|                                                                        | (1)                                                               | (2)                                                                | (3)                                                               | (4)                                                                |
| Specialist ×<br>SovietImpact ×<br>AfterSovietCollapse<br>( $\beta_1$ ) | .685 <sup>+</sup><br>(.387)                                       | .569 <sup>+</sup><br>(.311)                                        | .909<br>(.587)                                                    | .843 <sup>+</sup><br>(.461)                                        |
| Specialist ×<br>AfterSovietCollapse<br>( $\beta_2$ )                   | −.279 <sup>**</sup><br>(.097)                                     | −.308 <sup>**</sup><br>(.069)                                      | −.270 <sup>*</sup><br>(.116)                                      | −.340 <sup>**</sup><br>(.083)                                      |
| SovietImpact ×<br>AfterSovietCollapse<br>( $\beta_3$ )                 | .005<br>(.292)                                                    | .021<br>(.242)                                                     | −.330<br>(.454)                                                   | −.259<br>(.359)                                                    |
| No. of observations                                                    | 30,642                                                            | 49,110                                                             | 20,641                                                            | 34,061                                                             |
| No. of mathematicians                                                  | 1,634                                                             | 2,617                                                              | 1,075                                                             | 1,771                                                              |
| Chi <sup>2</sup>                                                       | 191.66 <sup>**</sup>                                              | 337.61 <sup>**</sup>                                               | 95.43 <sup>**</sup>                                               | 195.17 <sup>**</sup>                                               |
| Log-likelihood                                                         | −10427.25                                                         | −19880.36                                                          | −6399.54                                                          | −12674.41                                                          |

<sup>+</sup>  $p < .10$ ; <sup>\*</sup>  $p < .05$ ; <sup>\*\*</sup>  $p < .01$ .

\* The data are a panel at the author level based on publication data between 1980 and 2000. The unit of analysis is the author-year. All models are Poisson with robust standard errors, clustered at the individual author level, in parentheses. All models include controls for cumulative publications, nonlinear age profile, and individual and year fixed effects. The difference in the number of observations across models is a consequence of estimating all our models using the *xtpoisson* command in Stata; the command drops units without within-individual variance after factoring in all the independent and control variables.



**Table A6. Differential Number of Collaborators of Specialists Relative to Generalists in Areas Affected by the Collapse of the Soviet Union—Continuous Soviet Index Measure and Our Main Specification of Specialists and Generalists (i.e., Top 10th Percentile of the Diversification Distribution)\***

| Variable                                                                    | Full Sample                          |                                             | Matched Sample                       |                                             |
|-----------------------------------------------------------------------------|--------------------------------------|---------------------------------------------|--------------------------------------|---------------------------------------------|
|                                                                             | Total number of collaborators<br>(1) | Total number of unique collaborators<br>(2) | Total number of collaborators<br>(3) | Total number of unique collaborators<br>(4) |
| Specialist $\times$ SovietImpact $\times$ AfterSovietCollapse ( $\beta_1$ ) | .705**<br>(.238)                     | .495*<br>(.208)                             | .590*<br>(.265)                      | .447+<br>(.238)                             |
| Specialist $\times$ AfterSovietCollapse ( $\beta_2$ )                       | -.118*<br>(.047)                     | -.081*<br>(.038)                            | -.107+<br>(.055)                     | -.064<br>(.045)                             |
| SovietImpact $\times$ AfterSovietCollapse ( $\beta_3$ )                     | -.398*<br>(.174)                     | -.364*<br>(.159)                            | -.497*<br>(.206)                     | -.438*<br>(.185)                            |
| No. of observations                                                         | 96,917                               | 96,917                                      | 65,986                               | 65,986                                      |
| No. of mathematicians                                                       | 5,243                                | 5,243                                       | 3,459                                | 3,459                                       |
| Chi <sup>2</sup>                                                            | 123.02**                             | 197.00**                                    | 62.00**                              | 114.73**                                    |
| Log-likelihood                                                              | -88856.43                            | -71016.24                                   | -57696.83                            | -48287.99                                   |

+  $p < .10$ ; \*  $p < .05$ ; \*\*  $p < .01$ .

\* The data are a panel at the author level based on publication data between 1980 and 2000. The unit of analysis is the author-year. All models are Poisson with robust standard errors, clustered at the individual author level, in parentheses. All models include controls for cumulative publications, nonlinear age profile, and individual and year fixed effects. The difference in the number of observations across models is a consequence of estimating all our models using the *xtpoisson* command in Stata; the command drops units without within-individual variance after factoring in all the independent and control variables.

**Table A7. Changes in the Breakthrough Output of Specialist and Generalist Mathematicians after the Collapse of the Soviet Union\***

| Variable                                                                             | Full Sample                                                       |                                                                    | Matched Sample                                                    |                                                                    |
|--------------------------------------------------------------------------------------|-------------------------------------------------------------------|--------------------------------------------------------------------|-------------------------------------------------------------------|--------------------------------------------------------------------|
|                                                                                      | Count of<br>breakthroughs<br>(publications<br>in top 5%<br>cited) | Count of<br>breakthroughs<br>(publications<br>in top 10%<br>cited) | Count of<br>breakthroughs<br>(publications<br>in top 5%<br>cited) | Count of<br>breakthroughs<br>(publications<br>in top 10%<br>cited) |
|                                                                                      | (1)                                                               | (2)                                                                | (3)                                                               | (4)                                                                |
| Specialist $\times$<br>SovietImpact $\times$<br>AfterSovietCollapse<br>( $\beta_1$ ) | .587*<br>(.257)                                                   | .461*<br>(.203)                                                    | .685+<br>(.369)                                                   | .736*<br>(.292)                                                    |
| Specialist $\times$<br>AfterSovietCollapse<br>( $\beta_2$ )                          | -.285**<br>(.094)                                                 | -.315**<br>(.068)                                                  | -.265*<br>(.114)                                                  | -.343**<br>(.082)                                                  |
| SovietImpact $\times$<br>AfterSovietCollapse<br>( $\beta_3$ )                        | -.227<br>(.224)                                                   | -.171<br>(.178)                                                    | -.413<br>(.316)                                                   | -.455+<br>(.252)                                                   |
| No. of observations                                                                  | 30,642                                                            | 49,110                                                             | 20,641                                                            | 34,061                                                             |
| No. of mathematicians                                                                | 1,634                                                             | 2,617                                                              | 1,075                                                             | 1,771                                                              |
| Chi <sup>2</sup>                                                                     | 192.90**                                                          | 338.44**                                                           | 97.87**                                                           | 200.33**                                                           |
| Log-likelihood                                                                       | -10427.39                                                         | -19880.25                                                          | -6399.02                                                          | -12668.48                                                          |

+  $p < .10$ ; \*  $p < .05$ ; \*\*  $p < .01$ .

\* The data is a panel at the author level based on publication data between 1980 and 2000. The unit of analysis is the author-year. All models are conditional fixed-effect Poisson with robust standard errors, clustered at the author level, in parentheses. All models include controls for cumulative publications, nonlinear age profile, and individual and year fixed effects. The difference in the number of observations across models is a consequence of estimating all our models using the *xtpoisson* command in Stata; the command drops units without within-individual variance after factoring in all the independent and control variables.

**Table A8. Differential Creative Output of Specialists Relative to Generalists in Areas Affected by the Collapse of the Soviet Union—Only Japan\***

| Variable                                                                             | Full Sample                               |                                                          | Matched Sample                            |                                                          |
|--------------------------------------------------------------------------------------|-------------------------------------------|----------------------------------------------------------|-------------------------------------------|----------------------------------------------------------|
|                                                                                      | Simple<br>count of<br>publications<br>(2) | Citation-<br>weighted<br>count of<br>publications<br>(1) | Simple<br>count of<br>Publications<br>(4) | Citation-<br>weighted<br>count of<br>publications<br>(3) |
| Specialist $\times$<br>SovietImpact $\times$<br>AfterSovietCollapse<br>( $\beta_1$ ) | 1.392 <sup>•</sup><br>(.550)              | 1.564 <sup>••</sup><br>(.566)                            | .969 <sup>+</sup><br>(.558)               | 1.606 <sup>••</sup><br>(.401)                            |
| Specialist $\times$<br>AfterSovietCollapse<br>( $\beta_2$ )                          | -.026<br>(.199)                           | -.045<br>(.240)                                          | .275<br>(.169)                            | -.218<br>(.262)                                          |
| SovietImpact $\times$<br>AfterSovietCollapse<br>( $\beta_3$ )                        | -1.211 <sup>•</sup><br>(.496)             | -.451 <sup>+</sup><br>(.242)                             | -.927 <sup>+</sup><br>(.492)              | -.528 <sup>•</sup><br>(.245)                             |
| No. of observations                                                                  | 3,963                                     | 3,945                                                    | 2,535                                     | 2,535                                                    |
| No. of mathematicians                                                                | 211                                       | 210                                                      | 131                                       | 131                                                      |
| Chi <sup>2</sup>                                                                     | 98.76 <sup>••</sup>                       | 72.89 <sup>••</sup>                                      | 75.43 <sup>••</sup>                       | 97.18 <sup>••</sup>                                      |
| Log-likelihood                                                                       | -3440.28                                  | -12593.53                                                | -2111.21                                  | -6717.17                                                 |

<sup>+</sup>  $p < .10$ ; <sup>•</sup>  $p < .05$ ; <sup>••</sup>  $p < .01$ .

\* The data are a panel at the author level based on publication data between 1980 and 2000. The unit of analysis is the author-year. All models are Poisson with robust standard errors, clustered at the individual author level, in parentheses. All models include controls for cumulative publications, nonlinear age profile, and individual and year fixed effects. The difference in the number of observations across models is a consequence of estimating all our models using the *xtpoisson* command in Stata; the command drops units without within-individual variance after factoring in all the independent and control variables.

**Table A9. Differential Breakthrough Output of Specialists Relative to Generalists in Areas Affected by the Collapse of the Soviet Union—Only Japan\***

| Variable                                                                             | Full Sample                                                       |                                                                    | Matched Sample                                                    |                                                                    |
|--------------------------------------------------------------------------------------|-------------------------------------------------------------------|--------------------------------------------------------------------|-------------------------------------------------------------------|--------------------------------------------------------------------|
|                                                                                      | Count of<br>breakthroughs<br>(publications<br>in top 5%<br>cited) | Count of<br>breakthroughs<br>(publications<br>in top 10%<br>cited) | Count of<br>breakthroughs<br>(publications<br>in top 5%<br>cited) | Count of<br>breakthroughs<br>(publications<br>in top 10%<br>cited) |
|                                                                                      | (1)                                                               | (2)                                                                | (3)                                                               | (4)                                                                |
| Specialist $\times$<br>SovietImpact $\times$<br>AfterSovietCollapse<br>( $\beta_1$ ) | 1.261<br>(1.850)                                                  | .880<br>(.820)                                                     | 21.736**<br>(2.572)                                               | 2.074*<br>(.891)                                                   |
| Specialist $\times$<br>AfterSovietCollapse<br>( $\beta_2$ )                          | -.630<br>(1.060)                                                  | .444<br>(.545)                                                     | -2.454<br>(1.522)                                                 | -.128<br>(.654)                                                    |
| SovietImpact $\times$<br>AfterSovietCollapse<br>( $\beta_3$ )                        | -.302<br>(.976)                                                   | 1.029*<br>(.178)                                                   | -1.312<br>(1.359)                                                 | .579<br>(.527)                                                     |
| No. of observations                                                                  | 465                                                               | 1,255                                                              | 255                                                               | 758                                                                |
| No. of mathematicians                                                                | 25                                                                | 67                                                                 | 13                                                                | 39                                                                 |
| Chi <sup>2</sup>                                                                     | 5999.73**                                                         | 47.23**                                                            | 693.13**                                                          | 142988.67**                                                        |
| Log-likelihood                                                                       | -85.30                                                            | -315.44                                                            | -33.12                                                            | -159.09                                                            |

<sup>+</sup>  $p < .10$ ; \*  $p < .05$ ; \*\*  $p < .01$ .

\* The data are a panel at the author level based on publication data between 1980 and 2000. The unit of analysis is the author-year. All models are Poisson with robust standard errors, clustered at the individual author level, in parentheses. All models include controls for cumulative publications, nonlinear age profile, and individual and year fixed effects. The difference in the number of observations across models is a consequence of estimating all our models using the *xtpoisson* command in Stata; the command drops units without within-individual variance after factoring in all the independent and control variables.

**Table A10. Differential Number of Collaborators of Specialists Relative to Generalists in Areas Affected by the Collapse of the Soviet Union—Only Japan\***

| Variable                                                      | Full Sample                          |                                             | Matched Sample                       |                                             |
|---------------------------------------------------------------|--------------------------------------|---------------------------------------------|--------------------------------------|---------------------------------------------|
|                                                               | Total number of collaborators<br>(1) | Total number of unique collaborators<br>(2) | Total number of collaborators<br>(3) | Total number of unique collaborators<br>(4) |
| Specialist × SovietImpact × AfterSovietCollapse ( $\beta_1$ ) | 4.098**<br>(.648)                    | 3.514**<br>(.458)                           | 2.696**<br>(.503)                    | 2.999**<br>(.462)                           |
| Specialist × AfterSovietCollapse ( $\beta_2$ )                | .244<br>(.223)                       | .163<br>(.209)                              | .441<br>(.269)                       | .185<br>(.252)                              |
| SovietImpact × AfterSovietCollapse ( $\beta_3$ )              | -2.816**<br>(.333)                   | -2.725**<br>(.340)                          | -2.602**<br>(.354)                   | -2.623**<br>(.356)                          |
| No. of observations                                           | 3,175                                | 3,175                                       | 2,043                                | 2,043                                       |
| No. of mathematicians                                         | 170                                  | 170                                         | 106                                  | 106                                         |
| Chi <sup>2</sup>                                              | 155.83**                             | 170.02**                                    | 153.64**                             | 116.44**                                    |
| Log-likelihood                                                | -2638.75                             | -2063.65                                    | -1509.05                             | -1273.62                                    |

<sup>+</sup>  $p < .10$ ; \*  $p < .05$ ; \*\*  $p < .01$ .

\* The data are a panel at the author level based on publication data between 1980 and 2000. The unit of analysis is the author-year. All models are Poisson with robust standard errors, clustered at the individual author level, in parentheses. All models include controls for cumulative publications, nonlinear age profile, and individual and year fixed effects. The difference in the number of observations across models is a consequence of estimating all our models using the *xtpoisson* command in Stata; the command drops units without within-individual variance after factoring in all the independent and control variables.

**Table A11. Differential Creative Output of Specialists Relative to Generalists in Areas Affected by the Collapse of the Soviet Union—Dichotomous Diversification Measure with the Threshold at 50th Percentile of the Diversification Distribution\***

| Variable                                                                             | Full Sample                               |                                                          | Matched Sample                            |                                                          |
|--------------------------------------------------------------------------------------|-------------------------------------------|----------------------------------------------------------|-------------------------------------------|----------------------------------------------------------|
|                                                                                      | Simple<br>count of<br>publications<br>(2) | Citation-<br>weighted<br>count of<br>publications<br>(1) | Simple<br>count of<br>Publications<br>(4) | Citation-<br>weighted<br>count of<br>publications<br>(3) |
| Specialist $\times$<br>SovietImpact $\times$<br>AfterSovietCollapse<br>( $\beta_1$ ) | .195**<br>(.073)                          | .284*<br>(.139)                                          | .147<br>(.094)                            | .428**<br>(.158)                                         |
| Specialist $\times$<br>AfterSovietCollapse<br>( $\beta_2$ )                          | -.053*<br>(.022)                          | -.099+<br>(.060)                                         | -.036<br>(.026)                           | -.215**<br>(.062)                                        |
| SovietImpact $\times$<br>AfterSovietCollapse<br>( $\beta_3$ )                        | -.151**<br>(0.054)                        | -.226*<br>(.100)                                         | -.131*<br>(.064)                          | -.243*<br>(.122)                                         |
| No. of observations                                                                  | 241,376                                   | 241,216                                                  | 169,061                                   | 169,061                                                  |
| No. of mathematicians                                                                | 12,929                                    | 12,917                                                   | 8,952                                     | 8,952                                                    |
| Chi <sup>2</sup>                                                                     | 1375.65**                                 | 287.87**                                                 | 857.69**                                  | 132.08**                                                 |
| Log-likelihood                                                                       | -247395.68                                | -2192602.80                                              | -160979.11                                | -1187143.70                                              |

<sup>+</sup>  $p < .10$ ; \*  $p < .05$ ; \*\*  $p < .01$ .

\* The data are a panel at the author level based on publication data between 1980 and 2000. The unit of analysis is the author-year. All models are Poisson with robust standard errors, clustered at the individual author level, in parentheses. All models include controls for cumulative publications, nonlinear age profile, and individual and year fixed effects. The difference in the number of observations across models is a consequence of estimating all our models using the *xtpoisson* command in Stata; the command drops units without within-individual variance after factoring in all the independent and control variables.

**Table A12. Differential Breakthrough Output of Specialists Relative to Generalists in Areas Affected by the Collapse of the Soviet Union—Dichotomous Diversification Measure with the Threshold at 50th Percentile of the Diversification Distribution\***

| Variable                                                               | Full Sample                                                    |                                                                 | Matched Sample                                                 |                                                                 |
|------------------------------------------------------------------------|----------------------------------------------------------------|-----------------------------------------------------------------|----------------------------------------------------------------|-----------------------------------------------------------------|
|                                                                        | Count of<br>breakthroughs<br>(publications in<br>top 5% cited) | Count of<br>breakthroughs<br>(publications in<br>top 10% cited) | Count of<br>breakthroughs<br>(publications in<br>top 5% cited) | Count of<br>breakthroughs<br>(publications in<br>top 10% cited) |
|                                                                        | (1)                                                            | (2)                                                             | (3)                                                            | (4)                                                             |
| Specialist ×<br>SovietImpact ×<br>AfterSovietCollapse<br>( $\beta_1$ ) | .474**<br>(.173)                                               | .458**<br>(.134)                                                | .499*<br>(.238)                                                | .381*<br>(.178)                                                 |
| Specialist ×<br>AfterSovietCollapse<br>( $\beta_2$ )                   | -.179**<br>(.063)                                              | -.190**<br>(.045)                                               | -.234**<br>(.080)                                              | -.209**<br>(.057)                                               |
| SovietImpact ×<br>AfterSovietCollapse<br>( $\beta_3$ )                 | -.265+<br>(.136)                                               | -.257*<br>(.107)                                                | -.172<br>(.199)                                                | -.159<br>(.140)                                                 |
| No. of observations                                                    | 79,756                                                         | 121,890                                                         | 51,607                                                         | 81,171                                                          |
| No. of mathematicians                                                  | 4,215                                                          | 6,444                                                           | 2,724                                                          | 4,271                                                           |
| Chi <sup>2</sup>                                                       | 337.58**                                                       | 599.91**                                                        | 175.50**                                                       | 307.53**                                                        |
| Log-likelihood                                                         | -31158.63                                                      | -56967.03                                                       | -17401.17                                                      | -33439.19                                                       |

+  $p < .10$ ; \*  $p < .05$ ; \*\*  $p < .01$ .

\* The data are a panel at the author level based on publication data between 1980 and 2000. The unit of analysis is the author-year. All models are Poisson with robust standard errors, clustered at the individual author level, in parentheses. All models include controls for cumulative publications, nonlinear age profile, and individual and year fixed effects. The difference in the number of observations across models is a consequence of estimating all our models using the *xtpoisson* command in Stata; the command drops units without within-individual variance after factoring in all the independent and control variables.

**Table A13. Differential Number of Collaborators of Specialists Relative to Generalists in Areas Affected by the Collapse of the Soviet Union—Dichotomous Diversification Measure with the Threshold at 50th Percentile of the Diversification Distribution\***

| Variable                                                               | Full Sample                          |                                             | Matched Sample                       |                                             |
|------------------------------------------------------------------------|--------------------------------------|---------------------------------------------|--------------------------------------|---------------------------------------------|
|                                                                        | Total number of collaborators<br>(1) | Total number of unique collaborators<br>(2) | Total number of collaborators<br>(3) | Total number of unique collaborators<br>(4) |
| Specialist ×<br>SovietImpact ×<br>AfterSovietCollapse<br>( $\beta_1$ ) | .376**<br>(.105)                     | .329**<br>(.087)                            | .234+<br>(.138)                      | .230*<br>(.116)                             |
| Specialist ×<br>AfterSovietCollapse<br>( $\beta_2$ )                   | -.059+<br>(.032)                     | -.056*<br>(.025)                            | -.084*<br>(.039)                     | -.055+<br>(.032)                            |
| SovietImpact ×<br>AfterSovietCollapse<br>( $\beta_3$ )                 | -.173*<br>(.075)                     | -.213**<br>(.062)                           | -.075<br>(.094)                      | -.130+<br>(.077)                            |
| No. of observations                                                    | 213,426                              | 213,440                                     | 148,535                              | 148,549                                     |
| No. of mathematicians                                                  | 11,416                               | 11,417                                      | 7,860                                | 7,861                                       |
| Chi <sup>2</sup>                                                       | 314.40**                             | 534.15**                                    | 218.15**                             | 325.70**                                    |
| Log-likelihood                                                         | -223558.55                           | -178247.35                                  | -140870.74                           | -116589.05                                  |

+  $p < .10$ ; \*  $p < .05$ ; \*\*  $p < .01$ .

\* The data are a panel at the author level based on publication data between 1980 and 2000. The unit of analysis is the author-year. All models are Poisson with robust standard errors, clustered at the individual author level, in parentheses. All models include controls for cumulative publications, nonlinear age profile, and individual and year fixed effects. The difference in the number of observations across models is a consequence of estimating all our models using the *xtpoisson* command in Stata; the command drops units without within-individual variance after factoring in all the independent and control variables.



**Table A14. Differential Creative Output of Specialists Relative to Generalists in Areas Affected by the Collapse of the Soviet Union—No Individual and Year Fixed Effects\***

| Variable                                                                             | Full Sample                               |                                                          | Matched Sample                            |                                                          |
|--------------------------------------------------------------------------------------|-------------------------------------------|----------------------------------------------------------|-------------------------------------------|----------------------------------------------------------|
|                                                                                      | Simple<br>count of<br>publications<br>(2) | Citation-<br>weighted<br>count of<br>publications<br>(1) | Simple<br>count of<br>Publications<br>(4) | Citation-<br>weighted<br>count of<br>publications<br>(3) |
| Specialist $\times$<br>SovietImpact $\times$<br>AfterSovietCollapse<br>( $\beta_1$ ) | .279**<br>(.105)                          | .612**<br>(.206)                                         | .338**<br>(.121)                          | .771**<br>(.252)                                         |
| Specialist $\times$<br>AfterSovietCollapse<br>( $\beta_2$ )                          | -.069*<br>(.030)                          | -.273*<br>(.107)                                         | -.037<br>(.036)                           | -.240**<br>(.079)                                        |
| SovietImpact $\times$<br>AfterSovietCollapse<br>( $\beta_3$ )                        | -.235*<br>(.092)                          | -.462**<br>(.175)                                        | -.335**<br>(.107)                         | -.607**<br>(.208)                                        |
| SovietImpact $\times$<br>Specialist                                                  | .074<br>(.057)                            | .330<br>(.215)                                           | .080<br>(.061)                            | .390+<br>(.225)                                          |
| Specialist                                                                           | -.177**<br>(.017)                         | -.269**<br>(.075)                                        | -.105**<br>(.018)                         | -.150*<br>(.060)                                         |
| SovietImpact                                                                         | -.098*<br>(.049)                          | -.046<br>(.182)                                          | -.062<br>(.050)                           | .082<br>(.179)                                           |
| AfterIronCurtain                                                                     | -.060*<br>(.028)                          | -.058<br>(.142)                                          | -.069**<br>(.027)                         | .008<br>(.081)                                           |
| No. of observations                                                                  | 116,781                                   | 116,781                                                  | 77,686                                    | 77,686                                                   |
| No. of mathematicians                                                                | 6,358                                     | 6,358                                                    | 4,076                                     | 4,076                                                    |
| Chi <sup>2</sup>                                                                     | 3003.39**                                 | 6727.71**                                                | 2262.22**                                 | 5004.30**                                                |
| Log-likelihood                                                                       | -125934.66                                | -823039.86                                               | -82492.91                                 | -474208.55                                               |

+  $p < .10$ ; \*  $p < .05$ ; \*\*  $p < .01$ .

\* The data are a panel at the author level based on publication data between 1980 and 2000. The unit of analysis is the author-year. All models are Poisson with robust standard errors, clustered at the individual author level, in parentheses. All models include controls for cumulative publications and nonlinear age profile.

**Table A15. Differential Breakthrough Output of Specialists Relative to Generalists in Areas Affected by the Collapse of the Soviet Union—No Individual and Year Fixed Effects\***

| Variable                                                               | Full Sample                                                    |                                                                 | Matched Sample                                                 |                                                                 |
|------------------------------------------------------------------------|----------------------------------------------------------------|-----------------------------------------------------------------|----------------------------------------------------------------|-----------------------------------------------------------------|
|                                                                        | Count of<br>breakthroughs<br>(publications in<br>top 5% cited) | Count of<br>breakthroughs<br>(publications in<br>top 10% cited) | Count of<br>breakthroughs<br>(publications in<br>top 5% cited) | Count of<br>breakthroughs<br>(publications in<br>top 10% cited) |
|                                                                        | (1)                                                            | (2)                                                             | (3)                                                            | (4)                                                             |
| Specialist ×<br>SovietImpact ×<br>AfterSovietCollapse<br>( $\beta_1$ ) | .472 <sup>+</sup><br>(.256)                                    | .399 <sup>•</sup><br>(.200)                                     | .571<br>(.367)                                                 | .645 <sup>•</sup><br>(.293)                                     |
| Specialist ×<br>AfterSovietCollapse<br>( $\beta_2$ )                   | −.240 <sup>••</sup><br>(.091)                                  | −.285 <sup>••</sup><br>(.064)                                   | −.235 <sup>•</sup><br>(.113)                                   | −.320 <sup>••</sup><br>(.079)                                   |
| SovietImpact ×<br>AfterSovietCollapse<br>( $\beta_3$ )                 | −.174<br>(.224)                                                | −.136<br>(.176)                                                 | −.312<br>(.320)                                                | −.374<br>(.259)                                                 |
| SovietImpact ×<br>Specialist                                           | .513 <sup>•</sup><br>(.254)                                    | .461 <sup>•</sup><br>(.193)                                     | .563 <sup>+</sup><br>(.291)                                    | .536 <sup>•</sup><br>(.225)                                     |
| Specialist                                                             | −.423 <sup>••</sup><br>(.076)                                  | −.323 <sup>••</sup><br>(.054)                                   | −.184 <sup>•</sup><br>(.085)                                   | −.121 <sup>•</sup><br>(.060)                                    |
| SovietImpact                                                           | .017<br>(.222)                                                 | −.040<br>(.171)                                                 | .063<br>(.241)                                                 | −.033<br>(.190)                                                 |
| AfterIronCurtain                                                       | −.133<br>(.085)                                                | −.044<br>(.058)                                                 | .066<br>(.097)                                                 | .094<br>(.065)                                                  |
| No. of observations                                                    | 116,781                                                        | 116,781                                                         | 77,686                                                         | 77,686                                                          |
| No. of mathematicians                                                  | 6,358                                                          | 6,358                                                           | 4,076                                                          | 4,076                                                           |
| Chi <sup>2</sup>                                                       | 10204.70 <sup>••</sup>                                         | 10876.01 <sup>••</sup>                                          | 8689.40 <sup>••</sup>                                          | 8735.13 <sup>••</sup>                                           |
| Log-likelihood                                                         | −16967.68                                                      | −29730.01                                                       | −10566.15                                                      | −19068.42                                                       |

<sup>+</sup>  $p < .10$ ; <sup>•</sup>  $p < .05$ ; <sup>••</sup>  $p < .01$ .

\* The data are a panel at the author level based on publication data between 1980 and 2000. The unit of analysis is the author-year. All models are Poisson with robust standard errors, clustered at the individual author level, in parentheses. All models include controls for cumulative publications and nonlinear age profile.

**Table A16. Differential Number of Collaborators of Specialists Relative to Generalists in Areas Affected by the Collapse of the Soviet Union—No Individual and Year Fixed Effects\***

| Variable                                                      | Full Sample                          |                                             | Matched Sample                       |                                             |
|---------------------------------------------------------------|--------------------------------------|---------------------------------------------|--------------------------------------|---------------------------------------------|
|                                                               | Total number of collaborators<br>(1) | Total number of unique collaborators<br>(2) | Total number of collaborators<br>(3) | Total number of unique collaborators<br>(4) |
| Specialist × SovietImpact × AfterSovietCollapse ( $\beta_1$ ) | .410**<br>(.153)                     | .320*<br>(.135)                             | .429*<br>(.175)                      | .343*<br>(.155)                             |
| Specialist × AfterSovietCollapse ( $\beta_2$ )                | −.118**<br>(.045)                    | −.068+<br>(.036)                            | −.091+<br>(.053)                     | −.047<br>(.043)                             |
| SovietImpact × AfterSovietCollapse ( $\beta_3$ )              | −.250+<br>(.127)                     | −.253<br>(.117)                             | −.373*<br>(.151)                     | −.337*<br>(.134)                            |
| SovietImpact × Specialist                                     | −.111<br>(.125)                      | −.021<br>(.122)                             | .016<br>(.133)                       | .053<br>(.131)                              |
| Specialist                                                    | −.088*<br>(.036)                     | −.174**<br>(.030)                           | −.058<br>(.041)                      | −.096**<br>(.036)                           |
| SovietImpact                                                  | −.060<br>(.110)                      | .001<br>(.109)                              | −.061<br>(.109)                      | −.026<br>(.109)                             |
| AfterIronCurtain                                              | .008<br>(.041)                       | −.047<br>(.031)                             | −.004<br>(.044)                      | .035<br>(.035)                              |
| No. of observations                                           | 116,781                              | 116,781                                     | 77,686                               | 77,686                                      |
| No. of mathematicians                                         | 6,358                                | 6,358                                       | 4,076                                | 4,076                                       |
| Chi <sup>2</sup>                                              | 2546.82**                            | 6354.71**                                   | 2092.03**                            | 4378.16**                                   |
| Log-likelihood                                                | −109210.62                           | −89903.36                                   | −70810.55                            | −60643.89                                   |

+  $p < .10$ ; \*  $p < .05$ ; \*\*  $p < .01$ .

\* The data are a panel at the author level based on publication data between 1980 and 2000. The unit of analysis is the author-year. All models are Poisson with robust standard errors, clustered at the individual author level, in parentheses. All models include controls for cumulative publications and nonlinear age profile.
